# Supplementary material for: Active targeting of cancer cells by CD44 binding peptide-functionalized oil core-based nanocapsules
Source: Royal Society of Chemistry journal article supplement (doi:10.1039/d1ra03322k), 2021-01-01
Supplement: d1ra03322k1.pdf [file d1ra03322k1.pdf]

## 1 Supporting Information

### 2 Active targeting of cancer cells by CD44 binding peptide-functionalized oil 3 core-based nanocapsules

4 A. De Capua<sup>1,2</sup>, A. Palladino<sup>3</sup>, M. Chino<sup>4</sup>, C. Attanasio<sup>1,3,\*</sup>, A. Lombardi<sup>4</sup>, R. Vecchione<sup>1,\*</sup>, P. A.  
5 Netti<sup>1,2,5</sup>

6 1. Center for Advanced Biomaterials for Health Care@CRIB, Istituto Italiano di Tecnologia, Largo Barsanti e  
7 Matteucci 53, Napoli, 80125, Italy

8 2. Department of Chemical, Materials & Industrial Production Engineering, University of Naples Federico  
9 II, Naples 80125, Italy

10 3. Department of Veterinary Medicine and Animal Productions, University of Naples Federico II, Via F.  
11 Delpino 1, 80137 Naples, Italy

12 4. Department of Chemical Sciences, University of Naples Federico II, Complesso Universitario Monte S.  
13 Angelo, via Cintia 45, 80126 Naples, Italy

14 5. Interdisciplinary Research Center of Biomaterials, CRIB, University Federico II, P. le Tecchio 80, 80125  
15 Naples, Italy

16

## 17 NMR characterization

18 **Table S.1:** <sup>1</sup>H Chemical shift  $\delta$ , integral and coupling constant  $J$  of biotin hydrazide in 90/10  
19 H<sub>2</sub>O/D<sub>2</sub>O

| Name | $\delta$ | H's | Integral | Class | J's       |
|------|----------|-----|----------|-------|-----------|
| H c  | 1.30     | 2   | 2.04     | m     |           |
| H b  | 1.47     | 3   | 3.05     | m     |           |
| H d  | 1.59     | 1   | 1.09     | m     |           |
| H a  | 2.18     | 2   | 2.00     | t     | 7.4, 7.4  |
| H h' | 2.56     | 1   | 1.00     | d     | 12.4      |
| H h  | 2.80     | 1   | 1.00     | dd    | 5.1, 12.4 |
| H e  | 3.08     | 1   | 1.00     | m     |           |
| H f  | 4.11     | 1   | 1.00     | m     |           |
| H g  | 4.28     | 1   | 1.00     | m     |           |

20

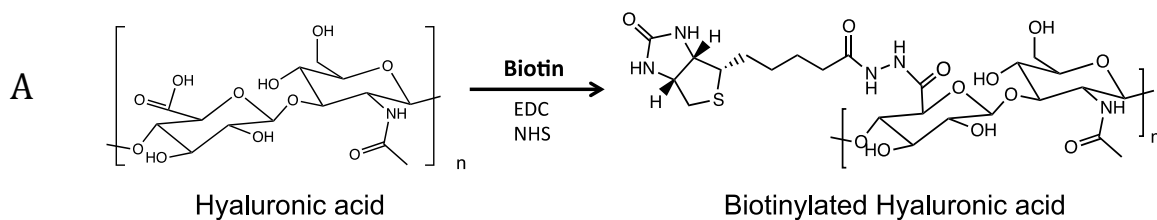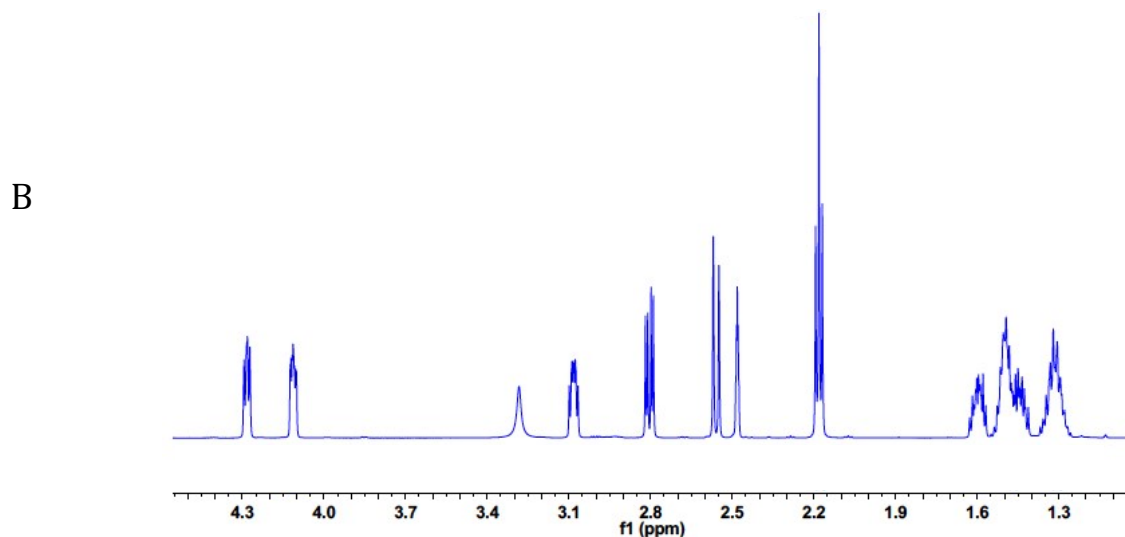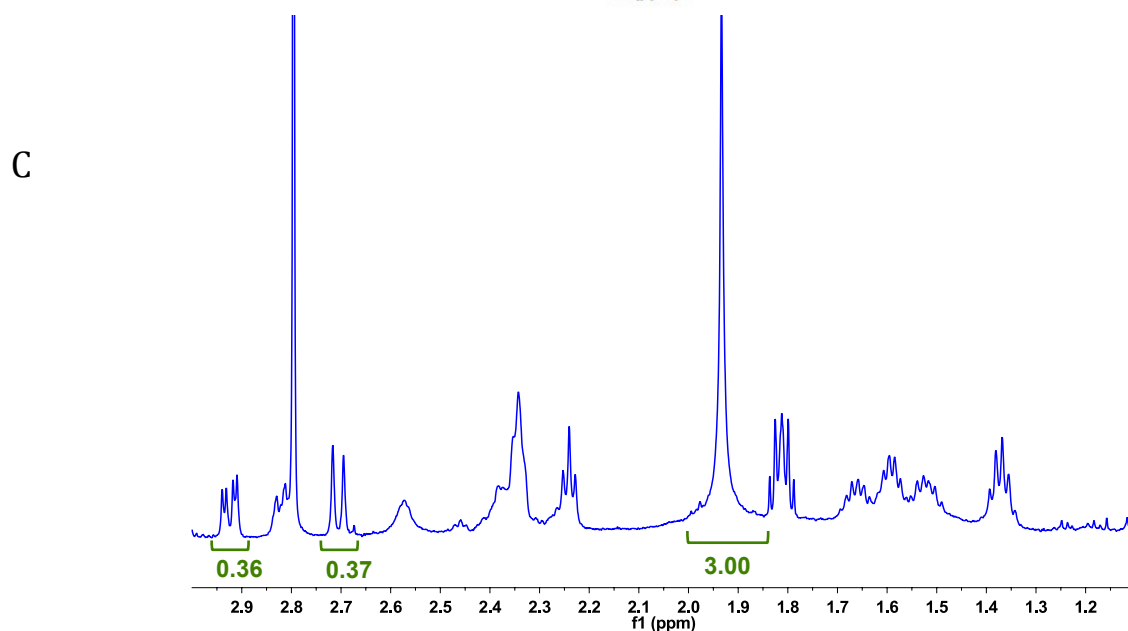

1  
 2 **Figure S.1:** (A) Schematic representation of Hyaluronic acid functionalization with biotin. (B)  $^1\text{H}$ -NMR spectra analysis of biotin  
 3 hydrazide, (C)  $^1\text{H}$ -NMR spectra analysis of biotinylated hyaluronic acid in 90/10  $\text{H}_2\text{O}/\text{D}_2\text{O}$ . Green lines represent the peak  
 4 integration.

5  $^1\text{H}$  NMR spectra of biotin hydrazide and biotin-HA were reported in Figure S.1.B, S.1.C. A  
 6 summary of chemical shift  $\delta$  assignments, integrals and coupling constant  $J$  of biotin-HA spectra  
 7 is reported in the Table S.2. The peak at chemical shift  $\delta$  1.91 ppm was assigned to the acetyl  
 8 group of HA whereas the doublet at 2.68 ppm and the doublet of doublet at 2.90 ppm was  
 9 assigned to the protons H  $h$  and H  $h'$  of biotin, respectively. The hydrogen H  $h$  is coupled with  
 10 the other H  $h'$  atom and appear as a doublet, while H  $h'$ , in addition to being coupled to H  $h$

1 (confirmed by the same coupling constant  $J=13$ ), is also coupled with the proton  $g$  appearing as  
2 doublet of doublet. The peak integration shown in Figure S.1.C was normalized respect to the  
3 number of protons of acetyl group, which was assigned to a value of three. The biotin-HA  
4 functionalization yield was calculated by the integration of the peaks assigned to biotin protons  
5 and to HA acetyl group.

6 **Table S.2:**  $^1H$  Chemical shift  $\delta$ , integral and coupling constant  $J$  of biotinylated HA in 90/10  
7  $H_2O/D_2O$ .

| Name               | $\delta$ | Integral | Class | J's         |
|--------------------|----------|----------|-------|-------------|
| Acetyl group of HA | 1.91     | 3.00     | s     |             |
| H h of Biotin      | 2.68     | 0.37     | d     | 13.00       |
| H h' of Biotin     | 2.90     | 0.36     | dd    | 4.93, 13.08 |

8

## 9 Multilayer deposition of polymers onto O/W NEs

10 Our research group developed an innovative protocol to deposit a layer of chitosan around the  
11 oil template, preserving long-term stability thanks to the implementation of a multi re-  
12 dispersion high-pressure process. We also set-up a novel approach to tune the O/W NE  
13 dimensions based on the amount of surfactant (lecithin) concentration. A reproducible size  
14 control was attained for different formulations, from  $\sim 160$  nm, with the lowest concentration  
15 of lecithin (1.9 g, named  $L_1$ ), to around 90 nm with the highest one (5.8 g, named  $L_4$ ).<sup>1</sup> Once  
16 functionalized with biotin, HA was used to build up a polymer bilayer around the oil core of  
17 O/W NE. Firstly, we started using NEs with an intermediate lecithin concentration ( $L_2$ , 140 nm)  
18 to validate polymer deposition protocol. Saturation method<sup>2</sup> was used to study the optimal  
19 concentration ratio between CT and biotinylated HA for the formation of consecutive  
20 polyelectrolytes layers, kept together by electrostatic forces, using layer by layer technique<sup>1</sup>.  
21 Figure S.2 shows size; Pdl and Z-potential data of bilayers coated NEs at different percentage  
22 (wt %) of biotinylated HA deposited on the monolayer  $L_2$  0.01 wt % CT-1 wt % O/W NEs.

23

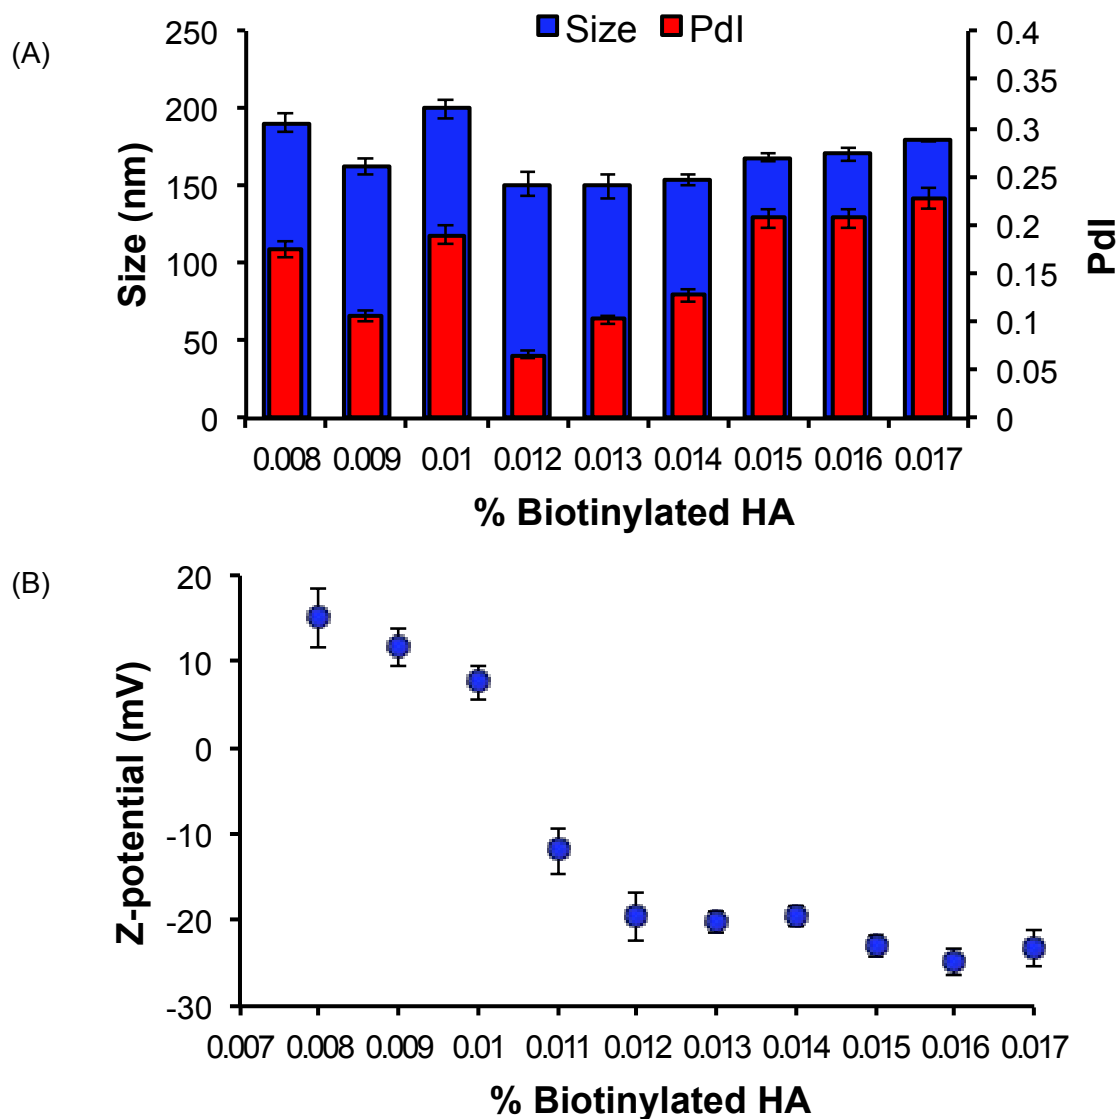

1

2 **Figure S.2:** DLS Size (A) and Z-Potential (B) data of biotinylated HA at different percentage deposited on  
 3 monolayer  $L_2$  0.01 wt % CT-1 wt % O/W NEs. Data are reported as mean  $\pm$  SD ( $n=3$ ).

4

5 The charge switches from a positive value (+ 15.1 mV) to a negative one, until a plateau is  
 6 observed, as consequence of the complete biotinylated HA coating above the positive chitosan  
 7 layer. Dimensional analysis shows that, when the monolayer is not completely covered by HA  
 8 or an excess of polymer deposition occurs, a destabilization of the system is observed (size  
 9 around 200 nm and a Pdl value that largely exceed the 0.1 value). Therefore, the optimum ratio  
 10 between HA and CT concentrations (wt %), in term of size (< 160 nm), Pdl (< 0.1) and Z-  
 11 potential ( $\sim$  -30 mV), is 2.4 (wt %/wt %). A comparison between biotinylated and non-  
 12 biotinylated multilayer system is shown in Figure S.3. The size of biotinylated and non-  
 13 biotinylated HA bilayer systems were comparable.

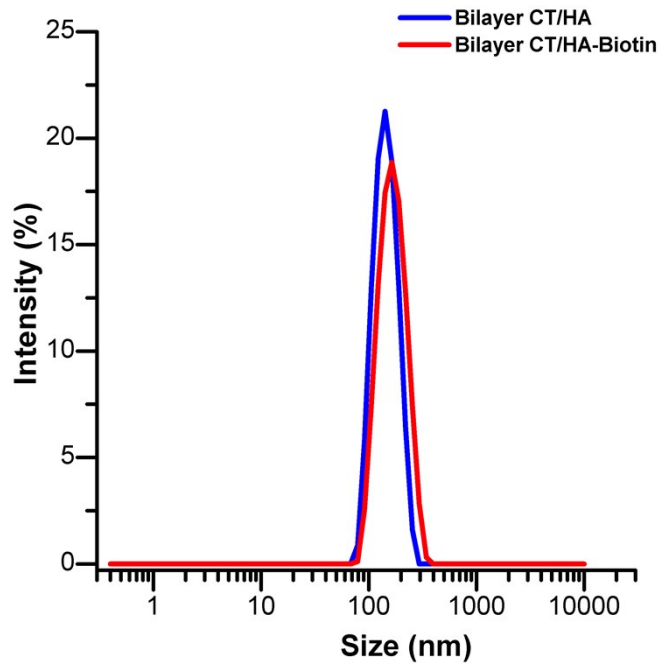

|                             | Size (nm)   | PdI           | Z-potential (mV) |
|-----------------------------|-------------|---------------|------------------|
| <b>Bilayer CT-HA</b>        | 141.2 ± 3.4 | 0.046 ± 0.004 | -21.7 ± 4.5      |
| <b>Bilayer CT-HA-biotin</b> | 151 ± 7.9   | 0.065 ± 0.013 | -22.9 ± 1.3      |

6 **Figure S.3:** Comparison of DLS size and Z-Potential data between bilayer 0.012 wt% HA-biotin-0.005  
7 wt% CT-0.5% O/W NEs and bilayer 0.012 wt% HA-0.005 wt % CT-0.5 % O/W NEs. Data are reported as  
8 mean ± SD (n=3).

9 Once identified the right conditions, in terms of size stability and Z-potential, to reach the  
10 deposition of two polymer layers, we aimed at reducing the dimensions of multi-layers coated  
11 O/W NEs. Therefore, we investigated their dimensional behaviour as a result of biotinylated  
12 HA depositions above the CT coated O/W NEs formulations made with the smallest  
13 nanoemulsion size (L<sub>4</sub>). Figure S.4 shows size and Z-potential of the bilayer made with  
14 biotinylated HA deposition, at different polymer concentrations, on L<sub>4</sub> 0.01 wt % CT-1 wt %  
15 O/W NEs. A similar trend was observed, in which, as in the previous case, the optimum ratio  
16 between HA and CT concentrations is 2.4 (wt %/wt %). Therefore, the size-scalability of our  
17 tool and its narrow distribution was verified. It was demonstrated on two different NEs  
18 template (L<sub>2</sub> and L<sub>4</sub>), but we would expect the same trend in a wider range of NEs dimensions.

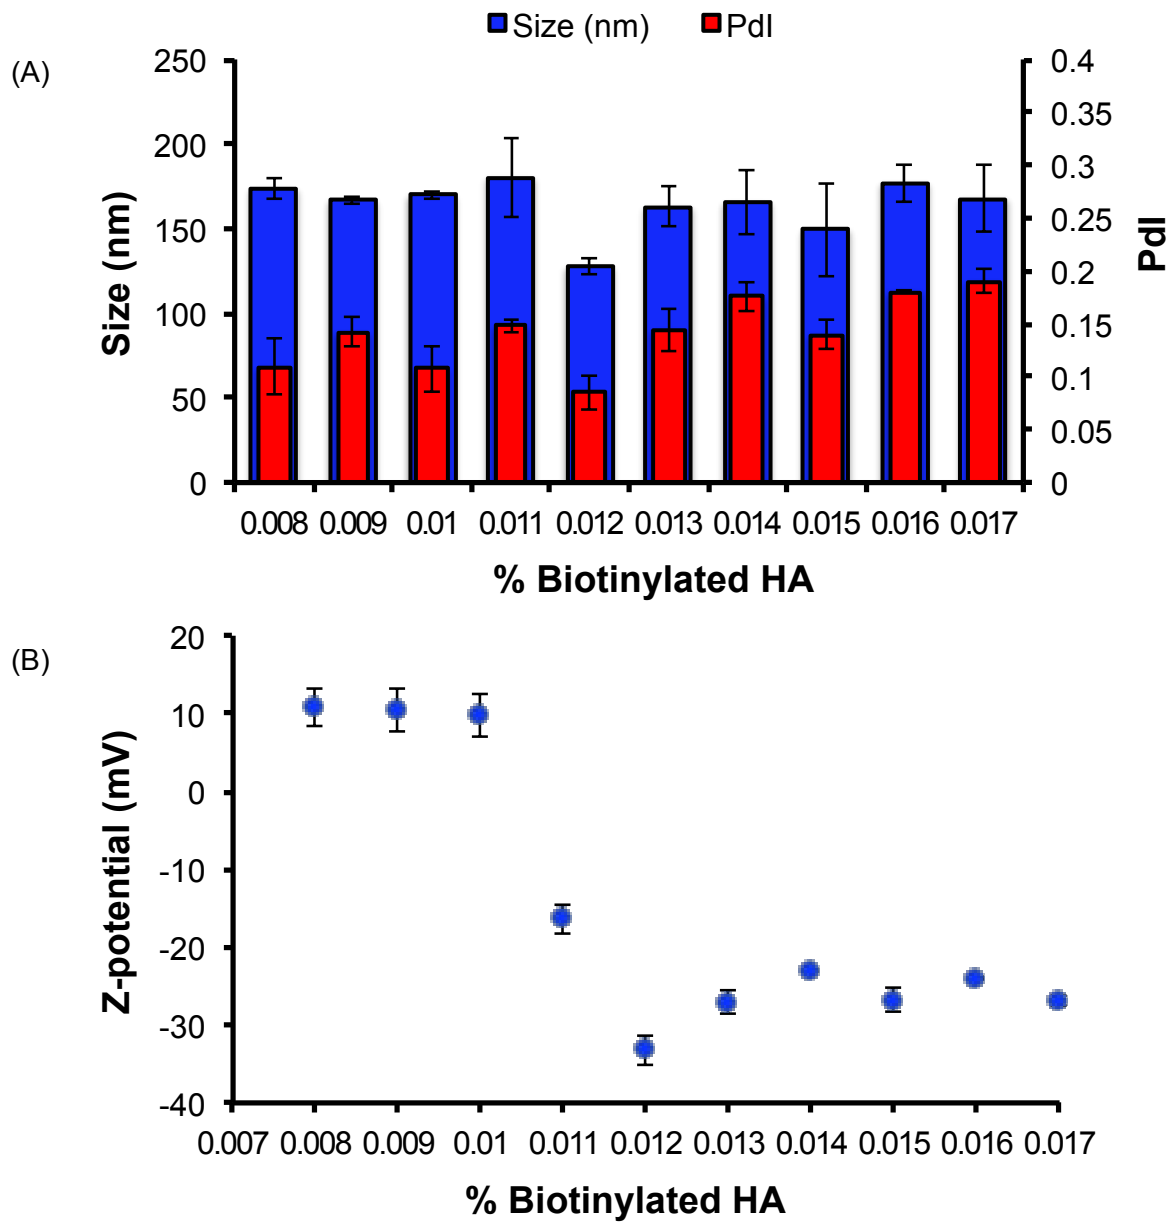

1  
2 **Figure S.4:** (A) DLS Size and (B) Z-Potential data of biotinylated HA at different percentage deposited on  
3 monolayer  $L_4$  of 1 wt % oil-chitosan 0.01 wt %. Data are reported as mean  $\pm$  SD (n=3).  
4

# 1 Isothermal Titration Calorimetry

2 **Table S.3:** Thermodynamic parameters of the interaction between streptavidin and 0.05 wt% HA-  
3 biotin-0.02 wt% CT-2.08 wt% O/W NEs at 25 °C.

| Model       | Variable              | Value                       |
|-------------|-----------------------|-----------------------------|
| Independent | $K_d$ (M)             | $8.3 \pm 0.1 \cdot 10^{-8}$ |
|             | $n^*$                 | $1.8 \pm 0.54$              |
|             | $\Delta H$ (kJ/mol)   | $-4.4 \pm 0.3 \cdot 10^2$   |
|             | T $\Delta S$ (kJ/mol) | $-396.24 \pm 31.20$         |
|             | $\Delta G$ (kJ/mol)   | $-40.61 \pm 0.58$           |
|             | $K_a$ (M)             | $1.2 \pm 0.2 \cdot 10^7$    |

4  
5 \*  $n$  value represents the molar ratio between streptavidin and biotinylated HA

6 A complete thermodynamic analysis of biotin hydrazide-streptavidin binding was preliminary  
7 performed. A solution of streptavidin 6  $\mu\text{M}$  in PBS 10 mM was titrated by stepwise injections of  
8 biotin hydrazide solution 100  $\mu\text{M}$  in PBS 10 mM. Data were analysed with an independent site  
9 model, where the macromolecule has  $n$  independent and equivalent binding sites for a ligand.<sup>3</sup>  
10 Figure S.5 shows the experimental data obtained subtracting the heat of ligand dilution into the  
11 buffer.

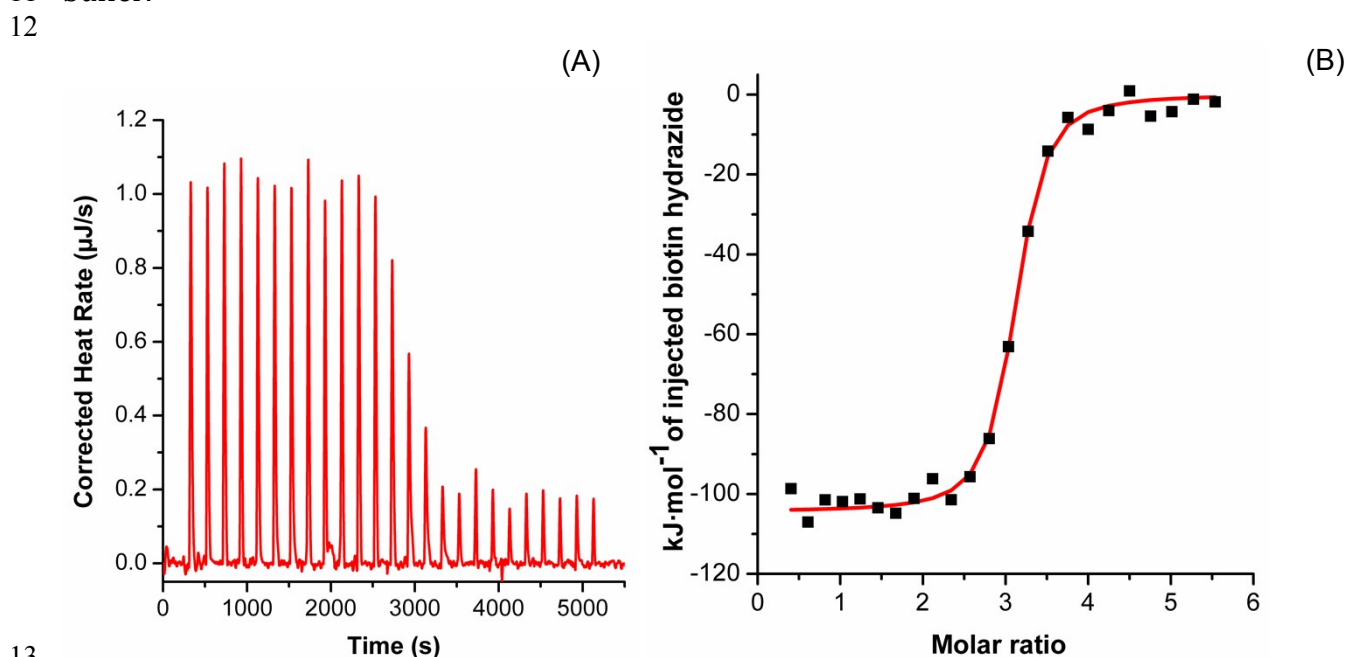

13  
14 **Figure S.5:** ITC data for titration by stepwise injection of biotin hydrazide 100  $\mu\text{M}$  in PBS 10 mM, in a  
15 solution of streptavidin 6  $\mu\text{M}$  in PBS 10 mM at 25 °C. The solid squares are the experimental data obtained  
16 by integrating the raw heat data and subtracting the heat of ligand dilution into the buffer. The lines  
17 represent the best fit obtained with the independent-sites model.

18

19

20

1 **Table S.4:** Thermodynamic parameters of the interactions between biotin hydrazide and  
 2 streptavidin. The values represent the average deviation of different ITC measurements.

| Model       | Variable             | Value                                      |
|-------------|----------------------|--------------------------------------------|
| Independent | $K_d$ (M)            | $7.23 \cdot 10^{-8} \pm 8.4 \cdot 10^{-8}$ |
|             | n                    | $2.80 \pm 0.51$                            |
|             | $\Delta H$ (kJ/mol)  | $-126.60 \pm 27.86$                        |
|             | $T\Delta S$ (kJ/mol) | $-84.44 \pm 31.96$                         |
|             | $\Delta G$ (kJ/mol)  | $-42.16 \pm 4.10$                          |
|             | $K_a$ (M)            | $4.27 \cdot 10^7 \pm 4.96 \cdot 10^7$      |

3  
 4 Thermodynamic parameters are reported in Table S.4. The interaction was enthalpy driven  
 5 ( $\Delta H = -126.60$  kJ/mol) with a substantial entropy cost ( $\Delta S = -84.44$  kJ/mol) to achieve the net  
 6 negative free energy change ( $\Delta G = -42.16$  kJ/mol). Even though we used the biotin hydrazide,  
 7 the affinity to streptavidin is very high; in fact  $K_d$  ( $K_d = 1/K_a$ ) values are in the order of nM, in  
 8 accordance with literature data.<sup>4</sup> These results are also in accordance with the thermodynamic  
 9 characterization of biotin-streptavidin by ITC analysis reported by Wen-Yih Chen *et al.* ( $\Delta G =$   
 10  $-68.6$  kJ/mol;  $\Delta H = -133.8$  kJ/mol;  $T\Delta S = -65.3$  kJ/mol;  $n = 2.5$ ).<sup>5</sup>  
 11 Little discrepancies can be probably ascribed to the terminal amine of biotin hydrazide  
 12 molecules, used in our case, which could affect the binding with the streptavidin. This analysis  
 13 has been used as reference point to next ones.  
 14 To establish the optimum range of concentrations to observe saturation, we titrated a solution  
 15 of biotinylated hyaluronic acid, loaded into the cell, with streptavidin. We investigated a wide  
 16 range of concentrations obtaining the best curve when 0.05 wt% Biot-HA was titrated with 16  
 17  $\mu\text{M}$  streptavidin. The experimental data are shown in Figure S.6.

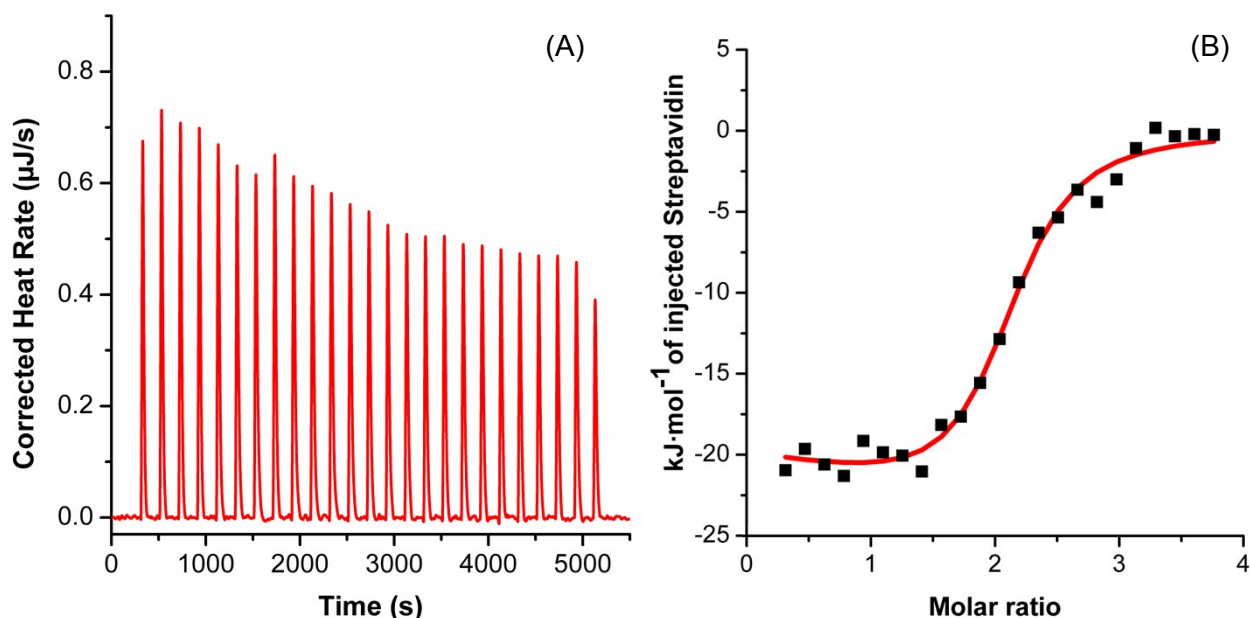

18  
 19 **Figure S.6:** ITC data for titration by stepwise injection of streptavidin in a solution of HA-biotin 0.05 wt%  
 20 at 25 °C. The solid squares are the experimental data obtained by integrating the raw heat data and  
 21 subtracting the heat of ligand dilution into the buffer. The lines represent the best fit obtained with the  
 22 independent-sites model.

23



1 **Table S.5:** Thermodynamic parameters of the interactions between biotinylated hyaluronic acid  
2 and streptavidin. The values represent the average deviation of different ITC measurements.

3

| Model       | Variable             | Value                                      |
|-------------|----------------------|--------------------------------------------|
| Independent | $K_d$ (M)            | $1.81 \cdot 10^{-7} \pm 1.8 \cdot 10^{-7}$ |
|             | $n^*$                | $1.78 \pm 0.15$                            |
|             | $\Delta H$ (kJ/mol)  | $-231.4 \pm 84.15$                         |
|             | $T\Delta S$ (kJ/mol) | $-192.08 \pm 87.22$                        |
|             | $\Delta G$ (kJ/mol)  | $-39.32 \pm 3.08$                          |
|             | $K_a$ (M)            | $1.10 \cdot 10^7 \pm 1.09 \cdot 10^7$      |

4

5

\*  $n$  value represents the molar ratio between streptavidin and biotinylated HA

6 The fitting parameters together with the calculated Gibbs free energy and the entropy gain are  
7 given in Table S.5. Although the binding process is exothermic ( $\Delta H < 0$ ), there is a considerable  
8 unfavourable entropic contribution probably due to the rearrangement of water molecules that  
9 play an important role in glycosaminoglycans (i.e HA).<sup>6</sup> Respect to previous experiment, in this  
10 case the high affinity between the biotinylated polymer and streptavidin was kept but the  $K_a$   
11 value was slightly decreased ( $K_a = 1.10 \cdot 10^7$  M). Because the biotin molecules were covalently  
12 linked to the polymer chain, a reduction of their degrees of freedom could be observed.  
13 Biotin-streptavidin specific interaction was confirmed by HA titration with streptavidin. Raw  
14 data in Figure S.7 shows only small peaks of dilution, demonstrating that the streptavidin and  
15 HA do not interact.

16

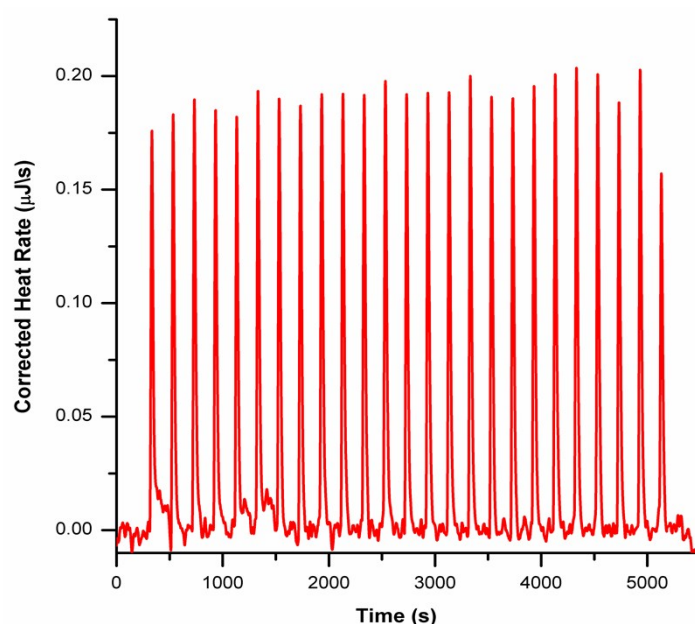

17

18 **Figure S.7:** ITC data for titration by stepwise injection of streptavidin into 0.05 wt% HA at 25 °C.

19

1

## 2 Nanocapsule decoration

3 A decoration strategy underlies the development of NCs in this study. ITC results were of  
4 fundamental importance to perform NCs assembly and avoid nonspecific interactions due to  
5 the addition of a larger amount of the biomolecules compared to site availability. A qualitative  
6 study of the specific interaction of streptavidin to biotinylated NCs was performed by confocal  
7 analysis. In accordance with ITC results, streptavidin, labelled with Atto 655, was added under  
8 sonication at a ratio 1:1 with the biotin to biotinylated and non-biotinylated O/W NEs. As  
9 shown in Figure S.8, the fluorescence intensity of the Atto-655-streptavidin was about 86.1%  
10 higher for biotinylated system when compared to non-biotinylated one, as consequence of the  
11 specific interaction with biotin-HA. No specific fluorescence signals were observed for the  
12 samples without biotin moieties. Analyses were performed on at least 3 images for each system.

13

14

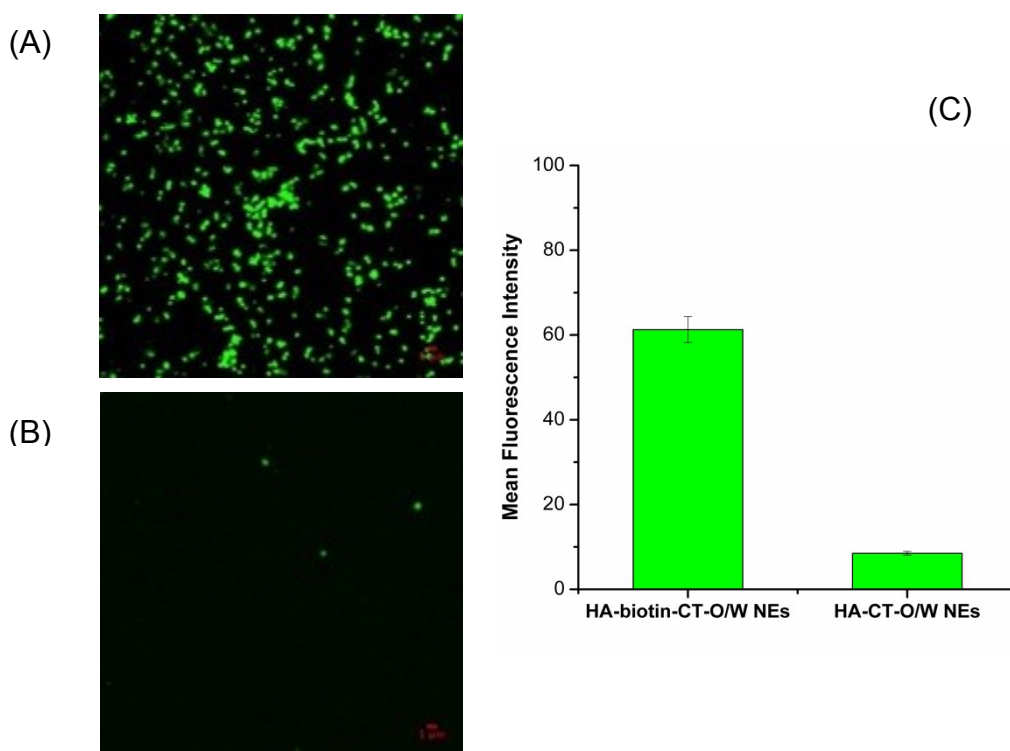

15

16

17 **Figure S.8:** Confocal images of Atto 655-streptavidin interaction with HA-biotin-CT-O/W NEs (A) and HA-  
18 CT-O/W NEs (B) (scale bar is 1  $\mu$ m). Plot of mean fluorescence intensity of Atto-655 labelled  
19 streptavidin(C). Data are reported as mean  $\pm$  SD (n=3).

20

21

## 22 Synthesis, purification and characterization of 5-FAM-CD44BP-WL

23

24 A 13-mer peptide that recognizes CD44 receptor has been previously identified. The amino acid  
25 sequence reported was: RLVSYNGIIFFLK (CD44BP without CGGG- linker CD44BP-WL). A  
26 coupling with 5-carboxyfluorescein (5-FAM) was performed to label the peptide at the N-term

1 (5-FAM-CD44BP-WL). Another non- $\alpha$ -amino acid ( $\beta$ -alanine) was introduced at the N-tem  
2 before the coupling reaction with 5-FAM to avoid an Edman-type elimination reaction.<sup>7</sup> Peptide  
3 synthesis was performed by exploiting the solid-phase peptide strategy (SPPS), using 9-  
4 fluorenylmethoxycarbonyl (Fmoc) chemistry and a super acid labile resin. 5-FAM-CD44BP-WL  
5 was synthesized and the resulting peptide was deprotected and cleaved from the resin. The  
6 crude peptide purity was assessed by analytical RP-HPLC, using a C-18 column with a linear  
7 elution gradient. The HPLC chromatograms of the crude and purified peptide chain are  
8 reported in Figure S.9. Unambiguous identification of the product at  $R_t = 27.44$  min was  
9 accomplished through ESI-MS analysis whose mass spectrum is reported in Figure S.10.

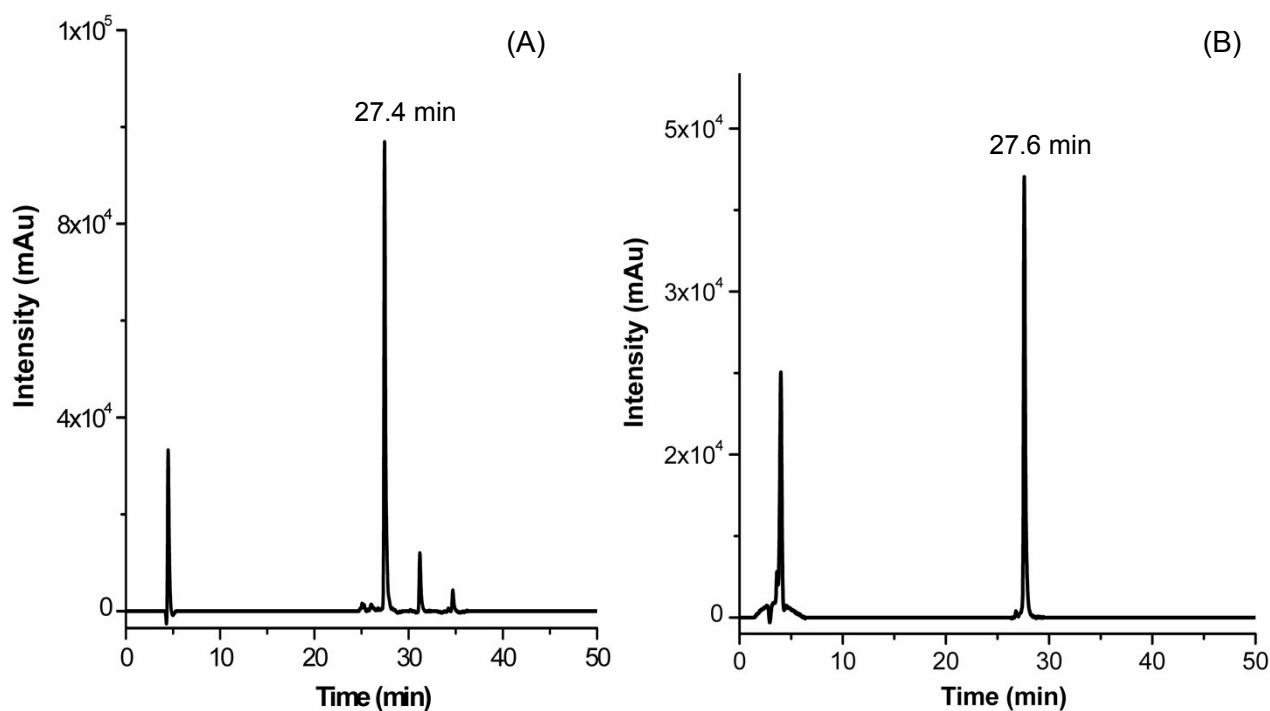

10  
11 **Figure S.9:** Analytical RP-HPLC of 5-FAM-CD44BP-WL crude peptide (A) and purified one (B). The  
12 chromatogram were detected at  $\lambda = 220$  nm.

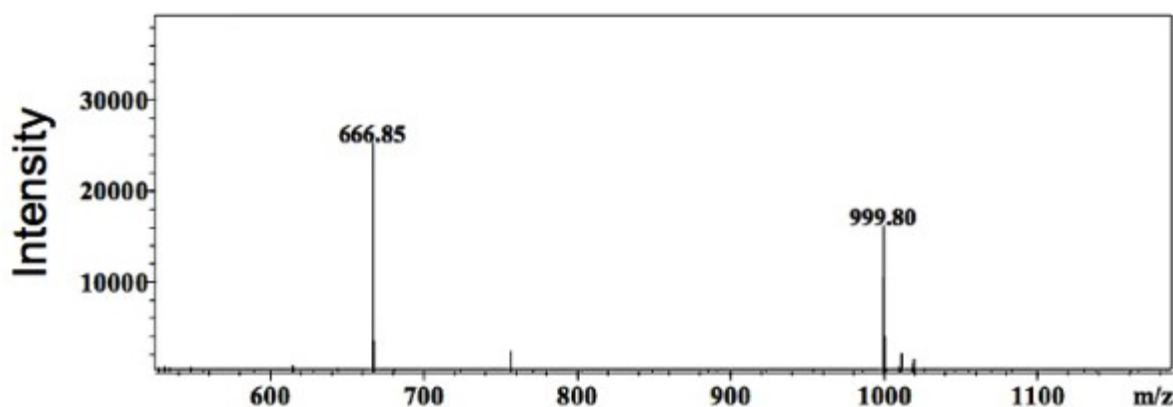

13  
14 **Figure S.10:** ESI-MS of the peak at  $R_t = 27.44$  min. The two masses at  $m/z$  666.85 and 999.80 represent  
15 respectively  $[M+3H]^{3+}$  and  $[M+2H]^{2+}$  of theoretical expected mass 1997.01 Da.

16  
17 The HPLC peak with  $R_t = 27.44$  min was correlated to a mass peak of  $m/z$  666.85 ( $[M+3H]^{3+}$ )  
18 and  $m/z$  999.80 ( $[M+2H]^{2+}$ ) which were consistent with the theoretical expected isotopic mass  
19 of 1997.01 Da of the peptide (observed mass:  $1997.55 \pm 0.5$  Da).

1 Once the synthesis was completed, a small amount of product was analyzed by TANDEM mass  
 2 spectrometry coupled to liquid chromatography. A single peak, corresponding to the desired  
 3 peptide, was found and its product ion scan showed the expected fragmentations (Figure S.11  
 4 and Table S.6).

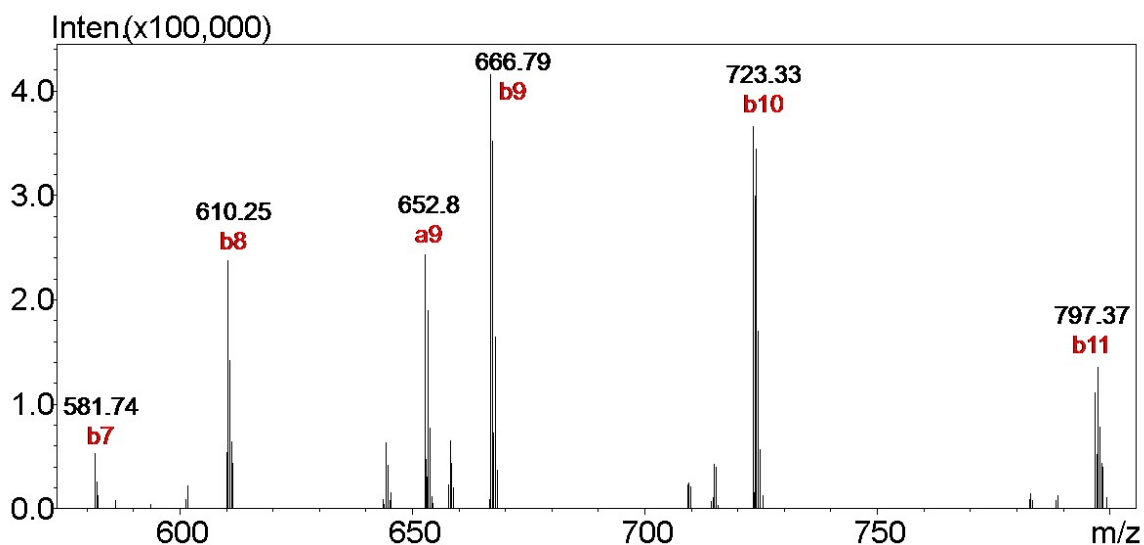

5  
 6 **Figure S.11:** ESI-MS-MS fragmentation spectra of 5-FAM-CD44BP-WL.

7  
 8 **Table S.6:** Mass table of 5-FAM-CD44BP-WL fragmentations. Numbers in cyan represent the  
 9 theoretical fragments identified in the experimental spectrum.

| #  | b       | b++    | b+++   | c       | Sequence  | y       | y++    | y+++   | #  |
|----|---------|--------|--------|---------|-----------|---------|--------|--------|----|
| 1  |         |        |        |         | 5FAM-βAla | 1997.01 | 999.01 | 666.34 | 14 |
| 2  | 585.19  |        |        | 602.21  | Arg       | 1568.93 | 784.97 | 523.65 | 13 |
| 3  | 698.27  |        |        | 715.30  | Leu       | 1412.83 | 706.92 | 471.62 | 12 |
| 4  | 797.34  | 399.17 | 266.45 | 814.36  | Val       | 1299.74 | 650.38 | 433.92 | 11 |
| 5  | 884.37  | 442.69 | 295.46 | 901.4   | Ser       | 1200.68 | 600.84 | 400.89 | 10 |
| 6  | 998.41  | 499.71 | 333.48 | 1015.44 | Asn       | 1113.64 | 557.33 | 371.89 | 9  |
| 7  | 1161.48 | 581.24 | 387.83 | 1178.5  | Tyr       | 999.60  | 500.30 | 333.87 | 8  |
| 8  | 1218.49 | 609.75 | 406.84 | 1235.52 | Gly       | 836.54  | 418.77 | 279.52 | 7  |
| 9  | 1331.58 | 666.29 | 444.53 | 1348.61 | Ile       | 779.52  | 390.26 | 260.51 | 6  |
| 10 | 1444.67 | 722.84 | 482.23 | 1461.69 | Ile       | 666.43  |        |        | 5  |
| 11 | 1591.73 | 796.37 | 531.25 | 1608.76 | Phe       | 553.35  |        |        | 4  |
| 12 | 1738.80 | 869.91 | 580.27 | 1755.83 | Phe       | 406.28  |        |        | 3  |
| 13 | 1851.89 | 926.45 | 617.97 | 1868.91 | Leu       | 259.21  |        |        | 2  |
| 14 |         |        |        |         | Lys       | 146.13  |        |        | 1  |

11  
 12 Further, 5-FAM-CD44BP-WL was purified by preparative RP-HPLC to yield the pure product  
 13 (Figure S.12). Pure 5-FAM-CD44BP-WL was obtained in ~30% yield from the crude peptide  
 14 and its purity was ascertained by analytical RP-HPLC, with an excellent purity of the 98%.

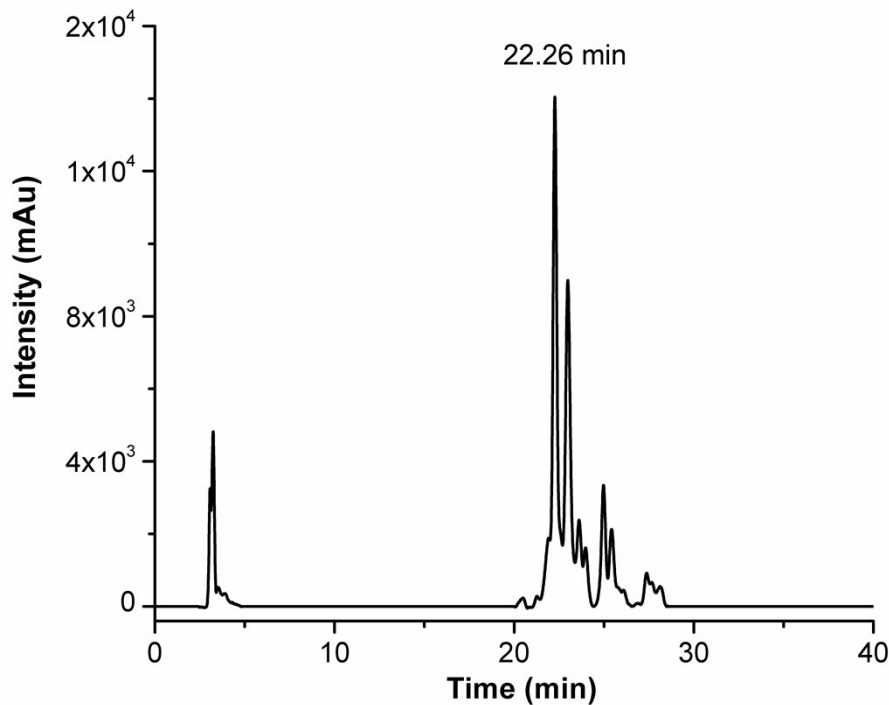

1

2 **Figure S.12:** Preparative RP-HPLC chromatogram of the crude 5-FAM-CD44BP-WL peptide; the  
 3 chromatogram was followed at  $\lambda = 220$  nm.

#### 4 Cellular uptake of 5-FAM-CD44BP-WL

5 In order to verify the CD44BP-WL peptide recognition by CD44 receptor, cellular uptake  
 6 experiments were performed. The binding and internalization of the CD44BP-WL into the cells  
 7 were evaluated by confocal microscopy. Because it's widely reported that human primary  
 8 glioblastoma cell line (U-87) over-expresses CD44 receptor, this cell line was chosen as positive  
 9 control<sup>8</sup>. On the contrary, human umbilical vein endothelial cells (HUVECs) were considered as  
 10 negative control due to their low CD44-expression<sup>9</sup>. Figure S.13 shows the normalized value of  
 11 expression of CD44 in different cell lines as reported by Human Protein Atlans.<sup>10</sup> The over-  
 12 expression of CD44 in the U-87 cells used for our experiments was also verified by real-time  
 13 PCR analysis (Figure S.14).

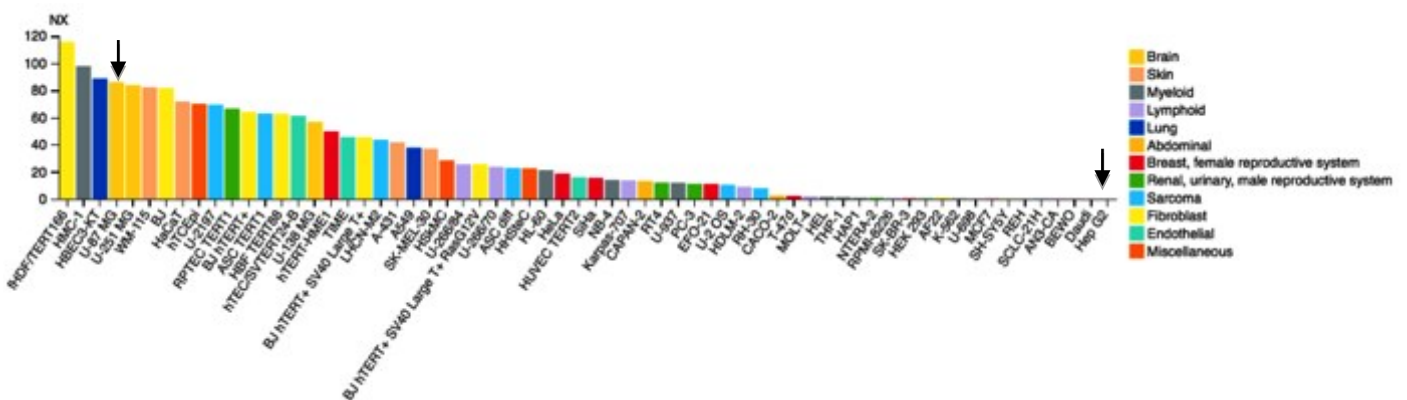

14

15 **Figure S.13:** Cell lines ordered by descending CD44 expression. Black arrows indicates the position of U87  
 16 cells on the left and of HepG2 cells on the right. Image available at [www.proteinatlas.org](http://www.proteinatlas.org).

17

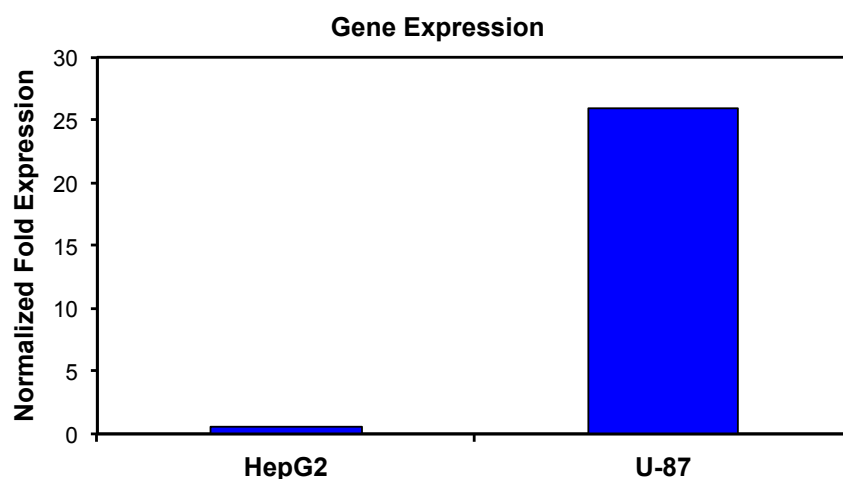

1  
2 **Figure S.14:** Real-time PCR analysis of CD44 expression for U-87 and HepG2 cell lines.

3

4 U-87 human primary glioblastoma cells were grown in DMEM (10% FBS, 1% L-Glu, 1%  
5 Streptomycin penicillin) and human umbilical vein endothelial cells (HUVECs) were kept in  
6 M200 (20% FBS and supplemented with LGSG kit). After seeding, cells ( $2 \times 10^5$ ) were left 2 h  
7 to allow attachment. Then, they were incubated and treated with 5-FAM-CD44BP-WL dissolved  
8 in DMSO (final concentration in cells  $8.5 \mu\text{M}$ ), for 1 h in cell specific medium at  $37^\circ\text{C}$ . Cells were  
9 then washed twice with PBS and fixed for 20 min in 4% PFA. Nuclei and cell shape were labelled  
10 by DRAQ5 (excitation 633 nm) and Phalloidin 555 (labels cytoskeleton), respectively. The  
11 fluorescence intensity was analyzed by Zeiss LSM 710 confocal microscope. Images were  
12 reconstructed by ImageJ software.

13 Figure S.15 shows confocal microscopy images of a confluent monolayer of U-87 and HUVEC  
14 cells treated with 5-FAM-CD44BP-WL ( $8.75 \mu\text{M}$ ) at  $37^\circ\text{C}$  for 1 h under standard cell culture  
15 conditions. The peptide was completely internalized into glioblastoma cells as clearly results in  
16 the image obtained with an increased magnification. U-87 cells are positive to 5-FAM-CD44BP-  
17 WL internalization at a level of 87% more than HUVECs (Figure S.16). This can be ascribed to  
18 the specific peptide recognition by CD44-receptor over-expressed by tumor cells.

19



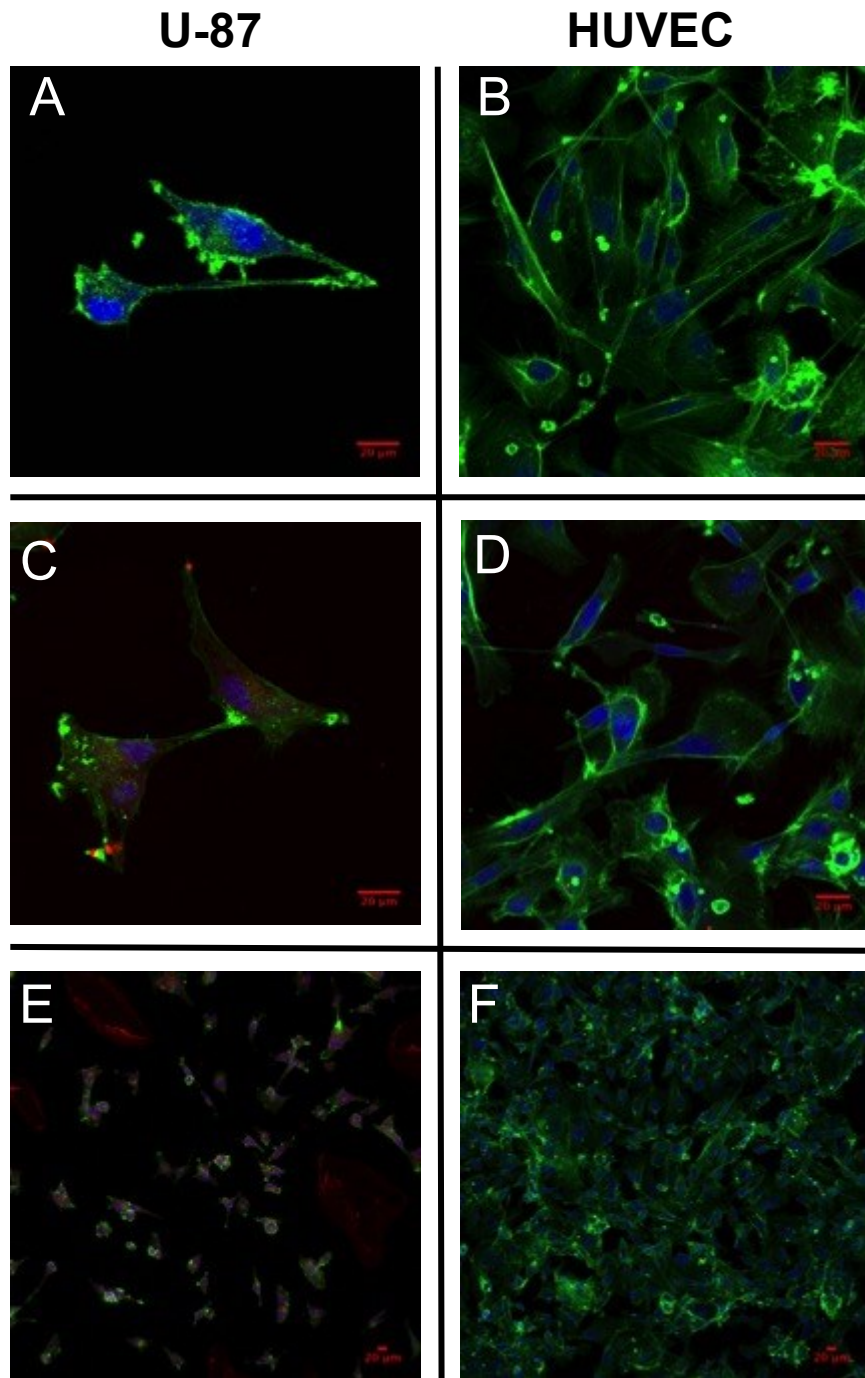

1

2 **Figure S.15:** Confocal microscopy images showing 5-FAM-CD44BP-WL interactions with confluent  
 3 monolayers of U-87 (C, E) and HUVEC (D, F) cells. For each cell line it is reported the image of untreated  
 4 cells used as control (A, B). Nuclei (blue) and cytosol (green) of the cells were stained with DRAQ5 and  
 5 Phalloidin 555 respectively, while red color represents peptide uptake. Scale bar was 20 $\mu$ m.

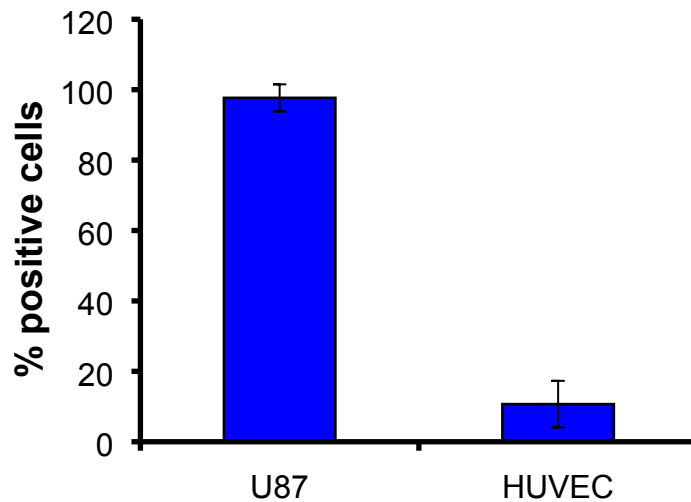

1  
 2 **Figure S.16:** CD44BP-WL uptake in U87 and HUVEC cell lines. It is reported the number of positive cells  
 3 to the peptide as mean  $\pm$  SD (n=3).

4 **5-FAM-CD44BP-PEG<sub>2k</sub>-biotin**

5 Once confirmed 5-FAM-CD44BP-WL uptake, peptide sequence was modified as schematized in  
 6 figure S.17; to allow the PEG conjugation at N-term.

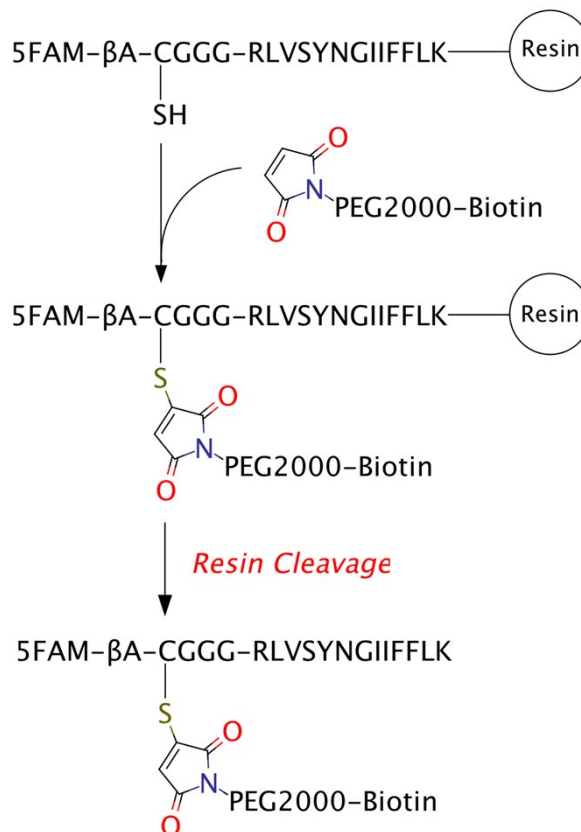

7  
 8 **Figure S.17:** Schematic representation of the solid-phase synthetic strategy of PEGylated peptide.

9 Figure S.18 shows ESI-MS spectrum of peptide sequence, before PEG conjugation (5-FAM-βA-  
 10 CGGG-RLVSYNGIIFFLK)



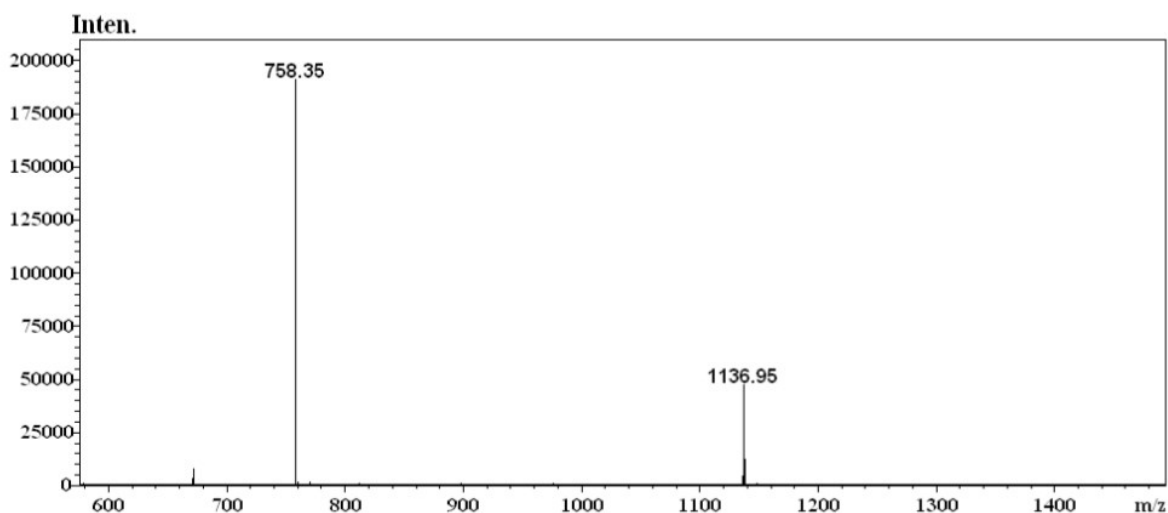

1  
 2 **Figure S.18:** ESI-MS of 5-FAM-CD44BP. The two masses at  $m/z$  758.35 and 1136.95 represent  
 3 respectively  $[M+3H]^{3+}$  and  $[M+2H]^{2+}$  of theoretical expected mass 2271.08 Da.

4  
 5 Once performed the coupling with the maleimide-PEG<sub>2k</sub>-biotin linker, the peptide was  
 6 deprotected and cleaved from the resin. The crude peptide purity was assessed by analytical  
 7 RP-HPLC, using a C-18 column with a linear elution gradient. The crude biotin-PEG<sub>2k</sub>-  
 8 maleimide-peptide (5-FAM-CD44BP-PEG) was purified by preparative flash chromatography,  
 9 using a Biotage ISOLERA flash purification system. The pooled fractions, containing the desired  
 10 products, were analyzed by analytical RP-HPLC. In Figure S.19 are reported HPLC  
 11 chromatograms of the crude and purified PEGylated peptide chain.

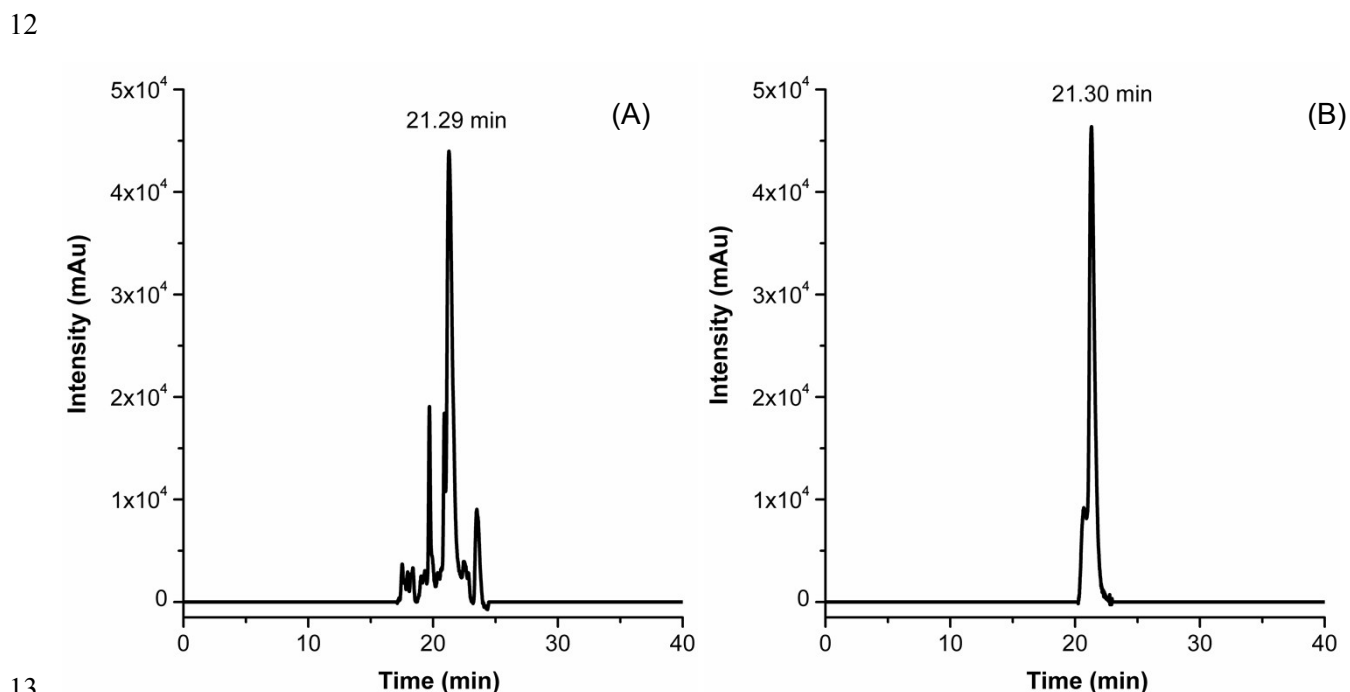

13  
 14 **Figure S.19:** Analytical RP-HPLC of 5-FAM-CD44BP-PEG crude peptide (A) and purified one (B). The  
 15 chromatogram were detected at  $\lambda = 220$  nm.

16  
 17

## 1 Matrix-assisted laser desorption/ionization time of flight (TOF) 2 mass spectrometry

3 Figure S.20 show the MALDI mass spectra (centroid) of biotin-PEG<sub>2k</sub>-Maleimide acquired  
4 before peptide conjugation. An intense, singly charged Gaussian distribution was observed with  
5 the most abundant ion at 2411.59 *m/z* and the typical expected ethylene oxide repeat unit of  
6 44 Da, proving the presence of PEG within the sample. An increment of +23 *m/z* with respect  
7 to the expected mass was observed, which can be attributed to the sodiated species (MNa)<sup>+</sup>.  
8 Because of the high affinity of PEG for both sodium and potassium, a cationization with Na<sup>+</sup> has  
9 been often observed.<sup>11</sup>

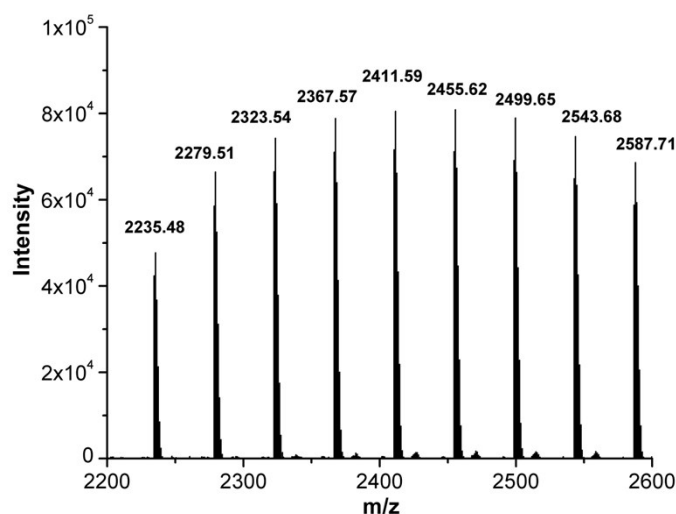

10

11 **Figure S.20:** MALDI mass spectra (centroid) of Biotin-PEG-Maleimide linker

12

### 13 Streptavidin and 5-FAM-CD44BP-PEG colocalization analyses

14 Colocalization of streptavidin and CD44BP-PEG built around the O/W NE was evaluated by  
15 confocal microscopy to confirm the specific interaction between them. To this purpose, Atto-  
16 655 conjugated to streptavidin and 5-FAM to peptide were used as dyes. Such a pair of  
17 fluorophores possesses excitation and emission spectra far enough apart from each other to  
18 avoid any cross talk. A widely reported method to evaluate the extent of colocalization is a  
19 simple images overlay deriving from different channels<sup>12</sup>. In Figure S.21 the superimposition  
20 of the red channel for the streptavidin and the green one for the peptide is reported. The  
21 resulting yellow/orange colour shows colocalization between the green and red signals  
22 meaning the correct deposition of the peptide on the streptavidin.

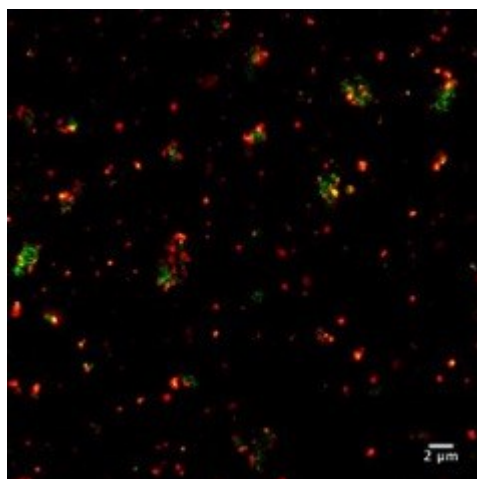

1

2 **Figure S.21:** Overlay of confocal images of the Atto streptavidin-655 (red) and 5-FAM-CD44BP-PEG  
3 (green) built above the O/W NEs. Scale bar is 2  $\mu\text{m}$ .

4

#### 5 **In vitro cytotoxicity analysis**

6 To investigate the behaviour of peptide functionalized NCs toward cancer cell lines, biological  
7 analyses were carried out. The oil core of the O/W NEs was pre-loaded with curcumin, which  
8 is a hydrophobic natural agent whose anticancer effects has already been demonstrated in  
9 different cancer cell lines, including U-87. In order to understand the appropriate incubation  
10 time to appreciate curcumin anti-tumor effect, a confluent monolayer of U-87 cells was  
11 incubated with curcumin loaded CD44BP-PEG-O/W NEs, diluted 1:5 in cell suspension, at a final  
12 curcumin concentration of 62.8  $\mu\text{M}$  for several time points (30 min, 1 h, 2 h and 4 h). Moreover,  
13 cells were treated with standard cell medium alone as positive control and with free curcumin  
14 as negative control. After incubation, cells were washed and a quantitative evaluation of cell  
15 viability (normalized to positive control, which is set to 100%) was obtained by PrestoBlue  
16 assay after 24 h.

17

18

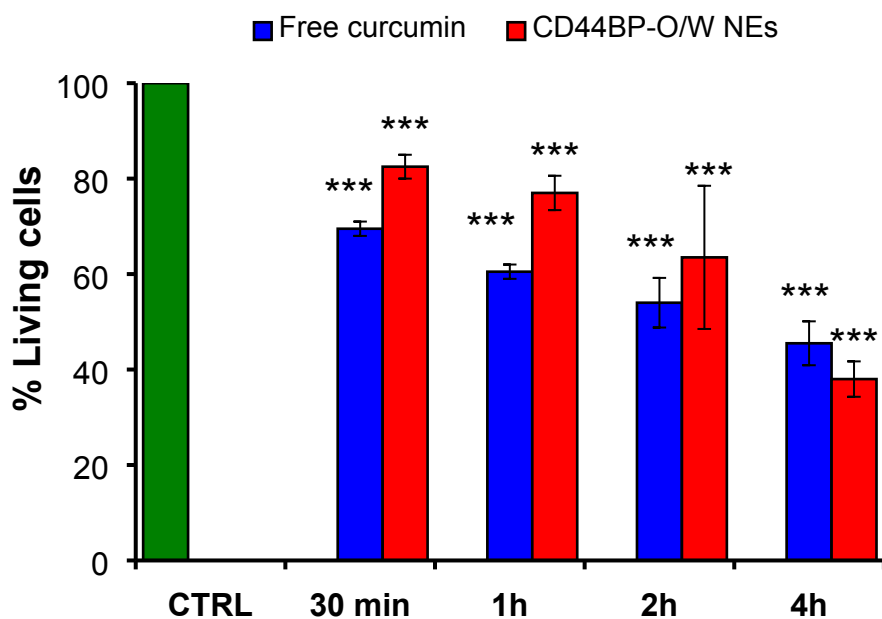

1

2 **Figure S.22:** Cytotoxicity assay of curcumin loaded CD44BP-PEG-O/W NEs and free curcumin. U-87 cells  
 3 were treated for several timepoints of incubation and cell viability was evaluated after 24 h. Data are  
 4 reported as mean of three independent experiment  $\pm$  SD (n=3) and expressed as percentage compared to  
 5 control cells. The asterisk (\*\*\*) indicates the statistical significance vs CTRL using Student's t test  
 6 considering  $p \leq 0.001$ .

7 Data show an increase of cell mortality both for free curcumin and for CD44BP-PEG-O/W NEs  
 8 over time. Indeed, curcumin significantly inhibited the vitality of U-87 cells in a dose and time  
 9 dependent manner as largely reported.<sup>13,14</sup> At incubation times below 4 h free curcumin was  
 10 more active than the encapsulated one most probably due to a partial internalization of the  
 11 curcumin loaded nanocarrier (Figure S.22). Therefore, an incubation time of 4 h was selected  
 12 for the successive experiment. Afterwards, control experiments were carried out treating cells  
 13 with the un-functionalized NCs. A confluent monolayer of U-87 cells were incubated with  
 14 curcumin loaded CD44BP-PEG-O/W NEs and PEG-O/W NEs, diluted 1:5 in cells, at a final  
 15 curcumin concentration of 62.8  $\mu$ M for 4 h for both of them. PEG-O/W NEs was used as negative  
 16 control because it was assembled with the same streptavidin-biotin strategy described before,  
 17 exhibiting a layer of PEG on the external nanocarrier shell (the same used for peptide  
 18 PEGylation), without the targeting conjugated moieties. Moreover, cells were treated with cell  
 19 medium alone as positive control and with free curcumin as second negative control. After  
 20 incubation, cells were washed and a quantitative evaluation of cell viability (normalized to  
 21 positive control, which is set to 100%) was performed after 24 h (Figure S.23).

22 Data showed a significant cytotoxicity effect of CD44BP-PEG-O/W NEs compared to blank. This  
 23 is an evident consequence of peptide capability to accumulate the nanocarrier on the cells,  
 24 thanks to ligand-receptor recognition, and to allow its internalization. CD44BP-PEG-O/W NEs  
 25 exhibit an increase of 40% of cell death respect to unfunctionalized NCs, and a little difference  
 26 in comparison with free curcumin.

27

28

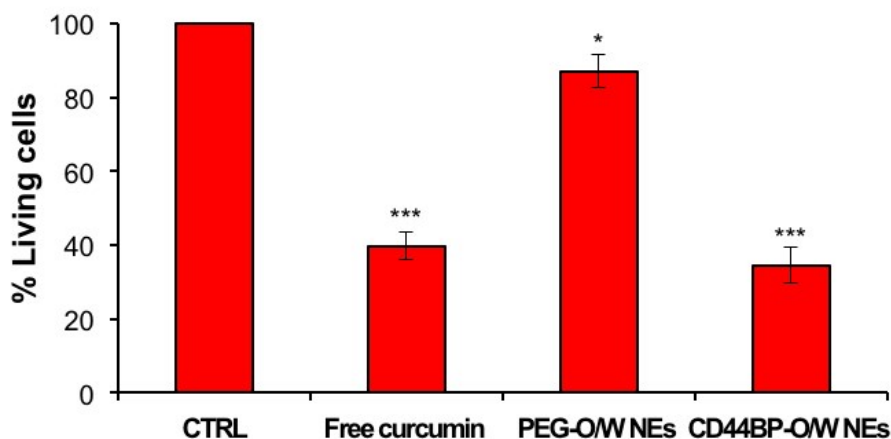

1

2 **Figure S.23:** Cytotoxicity assay of curcumin loaded CD44BP- PEG-O/W NEs and PEG-O/W NEs, and free  
 3 curcumin. U-87 cells were treated for 4h of incubation and cell viability was evaluated after 24 h. Data are  
 4 reported as mean of three independent experiments  $\pm$  SD (n=3) and expressed as percentage compared to  
 5 control cells. The asterisk (\*) indicates the statistical significance vs CTRL using Student's t test considering  
 6  $p < 0.05$ ; (\*\*\*)  $p \leq 0.001$ .

### 7 **Binding and uptake of CD44-targeted NCs by CD44-expressing cancer cells**

8 A cellular uptake assay was performed by confocal microscopy to better investigate the  
 9 cytotoxicity results and understand if the mortality observed could be attributed to curcumin.  
 10 Curcumin has intrinsic fluorescence properties; therefore, it can be used as probe for NC  
 11 detection. A confluent monolayer of U-87 cells were incubated with curcumin loaded CD44BP-  
 12 PEG-O/W NEs and PEG-O/W NEs, for 4 h at the same experimental condition of cytotoxicity test  
 13 described before. In addition, cells treated with cell medium alone were used as control (CTRL).  
 14 Figure S.24 shows confocal microscopic images of U-87 cell monolayers after NC uptake, which  
 15 strongly support the previous cytotoxicity results by showing strong fluorescence difference  
 16 between CD44BP-PEG-O/W NEs and PEG-O/W NEs. However, no fluorescence can be detected  
 17 from the images of the control cells (figure S.21 A, B). The presence of curcumin, displayed in  
 18 red, in the cells cytoplasm as well as in the nuclei was clearly more evidenced for peptide  
 19 functionalized NCs ( $90 \pm 24$  % more respect to the negative control). A possible explanation is  
 20 that the peptide induces much higher internalization, in accordance with CD44BP uptake in U-  
 21 87 cells described before. Furthermore, a slight amount of PEG-O/W NEs was detected in the  
 22 cells. A probable justification could be attributed to passive internalization exerted by NCs  
 23 especially those with diameters smaller than 200 nm, as ours are. In Figure S.25 is shown a plot  
 24 of mean fluorescence intensity of curcumin encapsulated in CD44BP-PEG-O/W NEs and in PEG-  
 25 O/W NEs normalized for the cell number. Data are expressed as mean of several images taken  
 26 from at least three wells.

27

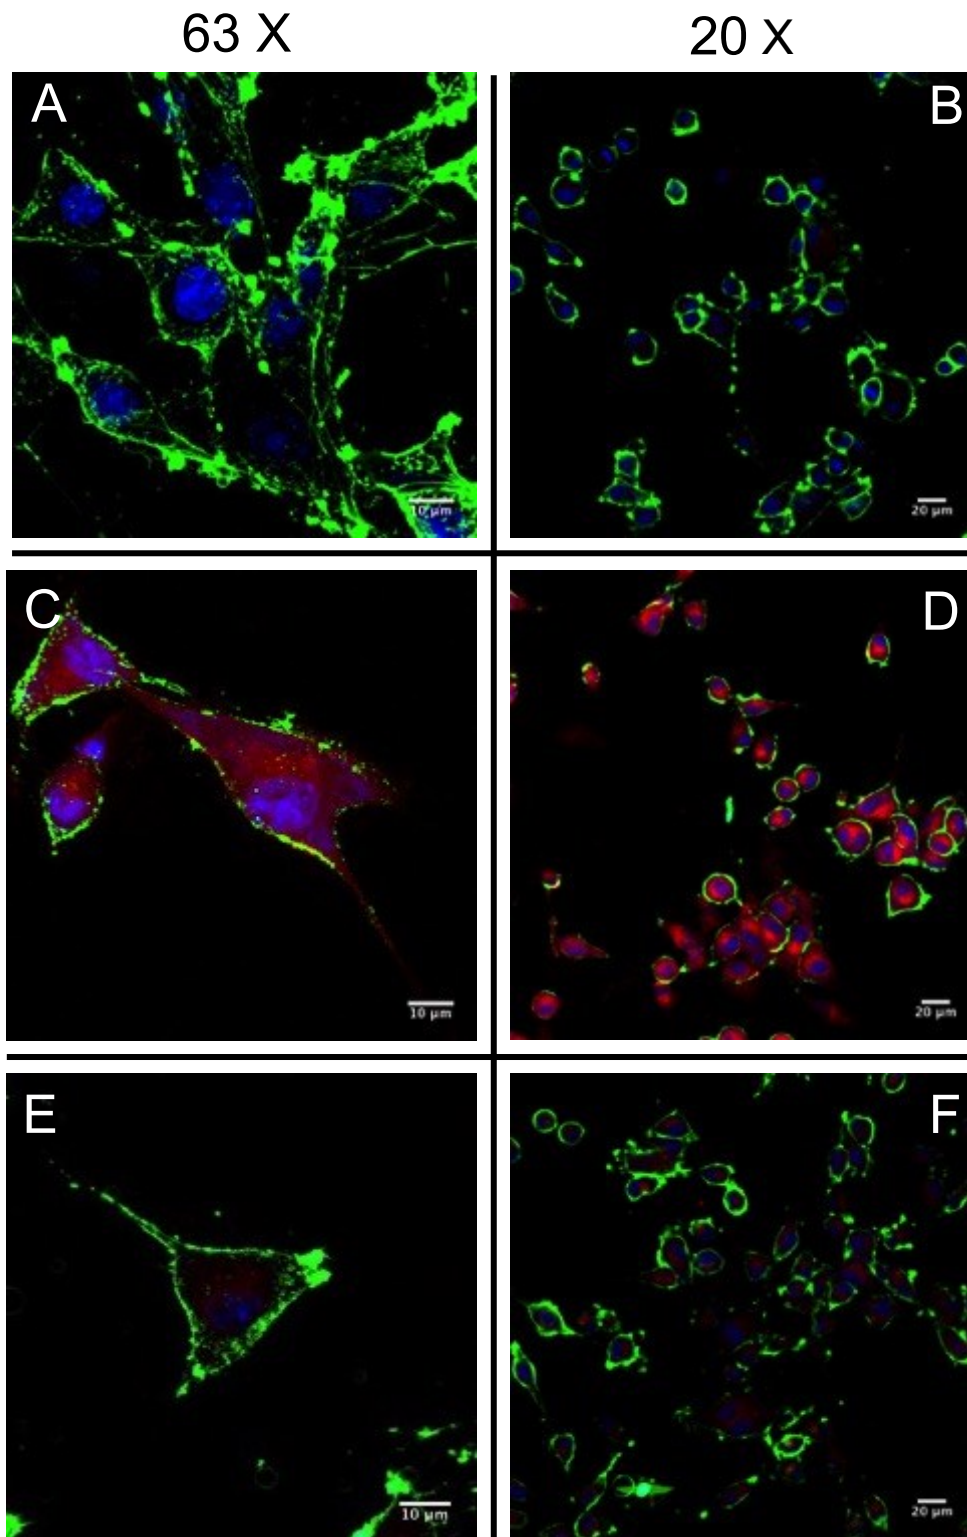

1  
2 **Figure S.24:** Confocal images of U-87 cells. (A, B) Untreated, (C, D) curcumin loaded C CD44BP-PEG-O/W  
3 NEs and (E, F) curcumin loaded PEG-O/W NEs interactions with a confluent monolayer of U-87 cells. Nuclei  
4 (blue) and cellular membrane (green) of the cells were stained with DAPI and WGA 555 respectively, while  
5 red color represents curcumin uptake. 63X and 20X refer to microscope objective. Scale bar is 10  $\mu\text{m}$  for  
6 63X images and 20  $\mu\text{m}$  for 20X images.

7  
8

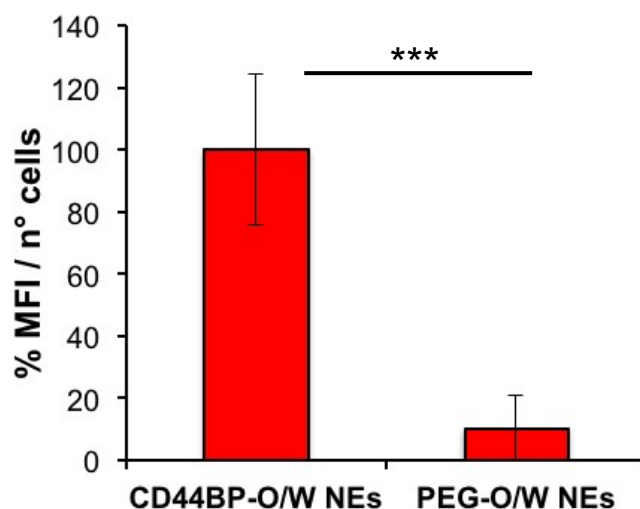

1  
 2 **Figure S.25:** Plot of mean fluorescence intensity of curcumin normalized to cell number. U-87 cells were  
 3 treated with curcumin loaded in CD44BP-PEG-O/W NEs and PEG-O/W NEs. Data are reported as mean  $\pm$   
 4 SD (n=3).  
 5

6 Cytotoxic test for U-87 cells of curcumin loaded and empty HA-coated O/W NEs is reported in  
 7 Figure S.26. The carrier itself has been demonstrated to be safe.

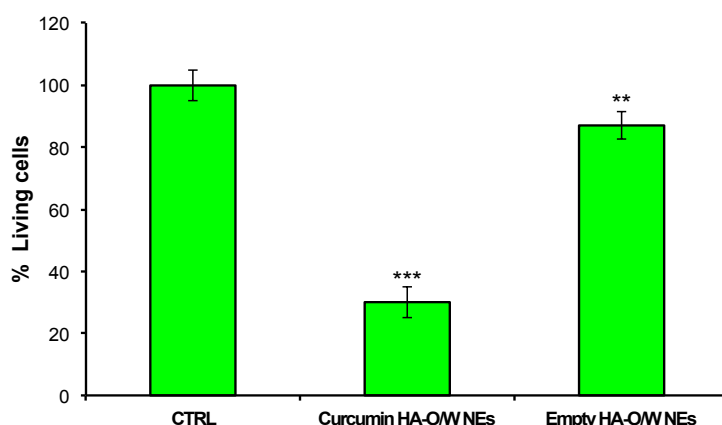

8  
 9 **Figure S.26** Cytotoxicity assay of curcumin loaded and empty HA-CT-O/W NEs. U-87 cells were treated for  
 10 4h of incubation and cell viability was evaluated after 24 h. Data are reported as mean of three independent  
 11 experiments  $\pm$  SD (n=3) and expressed as percentage compared to control cells. The asterisk (\*) indicates  
 12 the statistical significance vs CTRL,  $p \leq 0.01$  (\*\*),  $p \leq 0.001$  (\*\*\*)

13 Figure S.27 shows plot of mean fluorescence intensity of curcumin normalized to cell number.  
 14 HUVEC cells were treated with curcumin loaded in CD44BP-PEG-O/W NEs and PEG-O/W  
 15 NEsconfocal microscopic images of HUVEC cell monolayers after NC uptake. The presence of  
 16 curcumin appeared in red, while the cells cytoplasm and the nuclei were stained in green and  
 17 blue respectively. Images are representative of at least three independent experiments, and ten  
 18 images were examined for each treatment. HA-O/W NEs uptake was  $89 \pm 13$  % higher than  
 19 CD44BP-PEG-O/W NE one, while PEG-O/W NE uptake was not detected.

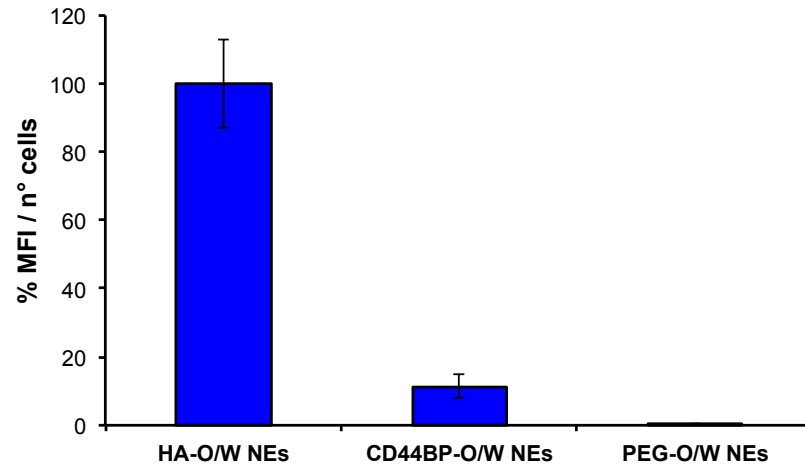

1

2 **Figure S.27:** Plot of mean fluorescence intensity of curcumin normalized to cell number. HUVEC cells were  
3 treated with curcumin loaded in HA-CT-O/W NEs, CD44BP-PEG-O/W NEs and PEG-O/W NEs. Data are  
4 reported as mean  $\pm$  SD (n=3).



## 1 Bibliography

- 2 1. Vecchione, R. *et al.* Tunable stability of monodisperse secondary O/W nano-emulsions.  
3 *Nanoscale* **6**, 9300 (2014).
- 4 2. Mun, S., Decker, E. A. & McClements, D. J. Effect of molecular weight and degree of  
5 deacetylation of chitosan on the formation of oil-in-water emulsions stabilized by  
6 surfactant-chitosan membranes. *J. Colloid Interface Sci.* **296**, 581–590 (2006).
- 7 3. C. J. Martinez, et al., Isothermal Titration Calorimetry: Thermodynamic Analysis of the  
8 Binding Thermograms of Molecular Recognition Events by Using Equilibrium Models, in  
9 Applications of Calorimetry in a Wide Context – Differential Scanning Calorimetry,  
10 Isothermal Titration Calorimetry and Microcalorimetry, *InTech*, (2013).
- 11 4. Hyre, D. E. *et al.* Cooperative hydrogen bond interactions in the streptavidin-biotin  
12 system. *Protein Sci.* **15**, 459–467 (2006).
- 13 5. Kuo, T.-C., Tsai, C.-W., Lee, P.-C. & Chen, W.-Y. Revisiting the streptavidin-biotin binding  
14 by using an aptamer and displacement isothermal calorimetry titration. *J. Mol. Recognit.*  
15 **28**, 125–128 (2015).
- 16 6. Santos, H. A., Manzanares, J. A., Murtomäki, L. & Kontturi, K. Thermodynamic analysis of  
17 binding between drugs and glycosaminoglycans by isothermal titration calorimetry and  
18 fluorescence spectroscopy. *Eur. J. Pharm. Sci.* **32**, 105–114 (2007).
- 19 7. Bird, G. H., Crannell, W. C. & Walensky, L. D. Chemical synthesis of hydrocarbon-stapled  
20 peptides for protein interaction research and therapeutic targeting. *Curr. Protoc. Chem.*  
21 *Biol.* **3**, 99–117 (2011).
- 22 8. Lim, S. *et al.* Glioblastoma-secreted soluble CD44 activates tau pathology in the brain.  
23 *Exp. Mol. Med.* **50**, 1-11 (2018).
- 24 9. Dai, J. *et al.* Osteopontin induces angiogenesis through activation of PI3K&sol;AKT and  
25 ERK1&sol;2 in endothelial cells. *Oncogene* **28**(38), 3412–3422 (2009).
- 26 10. The Human Protein Atlas. Available at: <https://www.proteinatlas.org>
- 27 11. Bogan, M. J. & Agnes, G. R. Poly(ethylene glycol) Doubly and Singly Cationized by  
28 Different Alkali Metal Ions: Relative Cation Affinities and Cation-Dependent Resolution  
29 in a Quadrupole Ion Trap Mass Spectrometer, *J. Am. Soc. Mass Spectrom.*, **13**(2), 177-186  
30 (2002).
- 31 12. Bolte, S. & Cordelières, F. P. A guided tour into subcellular colocalization analysis in  
32 light microscopy. *J. Microsc.*, **224**, 213–232 (2006).
- 33 13. Gersey, Z. C. *et al.* Curcumin decreases malignant characteristics of glioblastoma stem  
34 cells via induction of reactive oxygen species, *BMC Cancer*, **17**(1), 99 (2017)
- 35 14. Klinger, N.V., Mittal, S. Therapeutic Potential of Curcumin for the Treatment of Brain  
36 Tumors. *Oxid. Med. Cell Longev.*, **2016**,9324085 (2016)

37
